# Supplementary material
Source: publisher figshare collection journal article supplement (https://springernature.figshare.com/ndownloader/files/18016115)
Supplement: Supplementary file [file 18016115]

## ADDITIONAL FILE 1. Written fictional mission descriptions, EMS reports and HEMS reports.

### Study period: 24-hour shift on Saturday 17-9-2016 to Sunday 18-9-2016

For missions 2., 3., 5. and 6. please see the attached FH- and SV210-forms.

Not all variables have been filled in on the FH and SV 210 forms to enable us to observe how respondents apply information gathered from different sources. However, the FinnHEMS database is to be completed as comprehensively as possible according to the information given and at respondent's discretion.

Duty begins at 9:00 at the base

At 9:30 gear check and maintenance activities begin

**At 10:12 Study town's emergency response centre gives the call-out for mission 1.**

#### **Mission 1.**

*Study town's emergency response centre dispatches on 17.9.2016 at 10:13:*

*"A700 Care home Iltatähti, Tutkimuskuja 3 [Study Alley 3], Study town; call began at 10:12; care home nurses performing resuscitation; ETU01, ETU3221, FH90"*

Description of the situation:

*FH90 departs on the mission with copter at 10:18. At 10:22 FH90 is still on the way to the scene and ETU01 calls for FH90 on Virve radio (Used by Finnish Fire and Rescue, Police and Emergency Medical Service): "Here's a 91-year-old male patient with numerous primary diseases and advanced Alzheimer's. DNR decision exists. Last seen in bed awake half an hour ago. Primary rhythm asystole."*

*FH90 instructs to stop resuscitation and cancels the mission. ETU01 and 3221 handle the rest of the situation. FH90 turns back to the station at 10:24.*

At 10:33 back at the base with copter, gear check and maintenance of gear continues

At 11:30 gear check and maintenance completed

At 11:35 registration of mission 1 begins

At 11:41 registration of mission 1 completed.

**At 14:10 ETU1221 calls for FH90 on Virve and requests backup: "At the railway station of study town mission B202, there's a patient with no pulse, ventricular fibrillation, resuscitation initiated, will you join the mission?"**

At 14:10 FH 90 calls emergency response center and asks for FH90 to join ETU 1221's mission.

**At 14:11 Study town's emergency response centre dispatches on mission 2.**

**Mission 2. + ATTACHMENTS (FH-form and SV 210)**

*Study town's emergency response centre dispatches on 17.9.2016 at 14:11:*

*"B202 At the railway station, Tutkimuskatu [Study street], Study town, beginning of call 14:00; a small Fiat has crashed into a lamp post, driver in the car; ETU1221, RTU4125, FH90"*

*Description of the situation:*

*FH 90 departs on the mission with copter at 14:15. FH90 is at the scene at 14:27 and encounters the patient at 14:29.*

*A small private car has crashed into a lamp-post. The front bumper a little crushed, no other damage to the car. Driver's door is open, the patient lying down next to the car. The paramedic of ETU1221 is ventilating with breathing bag, I-Gel inserted. No external signs of trauma.*

*Advance information from the paramedic of ETU 1221: "A 72-year-old male, Pasi Ryhänen according to driving license. Found sitting in the car with seatbelt on. Safety devices didn't go off. Wasn't breathing, no pulse. Was removed from the vehicle and resuscitation commenced. The first analysis of rhythm at 14:08, then VF and shocked. Sinus rhythm restored at second shock and ROSC 12 min after beginning of call. IO access established but no drugs administered."*

*After ROSC haemodynamics unstable. Instructed by the FH 90 physician: the ETU 1221 paramedic inserts an i.v. cannula at the bend of the elbow and noradrenaline-infusion is initiated with it. Patient's level of consciousness is still low, keeps his eyes closed, makes no sounds, flexes on pain symmetrically with limbs on both sides. Makes spontaneous efforts at respiration. Decision to intubate with sedation, in addition an arterial cannula is inserted.*

*The patient is transported by ambulance to Y9 (university hospital of study town) escorted by the physician. Patient enrolled and handed over to the ED at 15:30. In this context information on patient's primary diseases: "Hypertension, prostate cancer operated on in 2008 and in remission."*

At 16:00 back at base, supplies replenished

At 16:15 registration of mission 2 begins

**At 16:18 Study town's emergency response center dispatches on mission 3.**

**Mission 3. + ATTACHMENTS (FH form and SV 210s)**

*Study town's emergency response centre dispatches on 17.9.2016 at 16:18:*



*"A203 freeway ramp, study town; RTA two cars, head-on collision, four affected, 80 km/h speed limit; ETU1241, ETU1231, ETU2221, RTU331, RTU231, FH90"*

*Description of the situation:*

*FH 90 departs on the mission with copter at 16:24. ETU1231 the first EMS unit at the scene and on the orders of the EMS supervisor, the paramedic of ETU1231 is the on-scene medical commander. FH90 at the scene at 16:32.*

*At the scene in its own lane front facing forward a green Audi, front bonnet crushed, airbags activated, driver in the car, rescue detaching, back doors open. In addition, in front of the Audi a red Skoda in the ditch on its left side, bonnet to bonnet with Audi, front bonnet crushed, driver's side of the car crushed, safety devices activated, driver in the car, rescue detaching.*

*L5 gives further information: " One red patient (Rami Eskola, 27 years) in the Skoda, one yellow in the Audi (Mirja Juusela, 38 years) and two green in the Audi (Kyllikki Juusela 69 years and Erkki Juusela 74 years). The green ones got out of the car by themselves and called the emergency response centre. The red patient is breathing, thin radial pulse, unalert. The yellow one awake, radial pulse present, no pain, can't get out of the car by herself. ETU2221 treats the green woman. ETU1241 treats the green man. We will treat the yellow driver once released. Will you treat the red patient?"*

*FH90 doc quickly goes round the other patients, instructs on pain medication and transport with trauma pre-alert to the university hospital. The doc takes a photo with a cell phone of the other patients' SV210 forms. After this the doc moves to the red patient who is just being transferred by rescue onto a spine board, a collar is in position. In prone position the patient opens his eyes to speech, makes sounds and indicates pain sites. Is very pale and hypotensive, cold peripherally. Intra-abdominal bleeding suspected. According to "Load and go" principle taken to Y9 by helicopter. By road from the accident scene to Y9 110 km, estimated transportation time by copter 20 min.*

*Before transportation the FH90 doc establishes i.v. access on the patient. During transportation eFAST and administration of pain medication by FH90 doctor. Pre-alert on the patient to Y9 ED.*

*At 17:05 FH90 is on hospital helipad and at 17:15 the patient has been handed over to the ED at study town university hospital.*

*At 17:45 back at base by copter*

*At 18:00 replenishing of supplies*

*At 18:15 registration of mission 2. continues*

*At 18:30 registration of mission 2. completed, and registration of mission 3 begins*

*At 18:59 registration of mission 3. completed*

## **At 19:37 study town's emergency response centre dispatches on mission 4**

### **Mission 4.**

*Study town's emergency response centre dispatches on 17.9.2016 at 19:37*

*"A700 Tutkimuskuja 2 [Study alley 2], Study town; beginning of call 19:33; not breathing; ETU3221, ETU4882, FH90"*

#### *Description of the situation:*

*At 19:39 the copter is being moved on the dolly from the hangar, the copter's engine not running. The emergency response centre informs: "Advising units en route for Tutkimuskuja, mission code changed to C772"*

At 19:40 FH90 doc states that (s)he isn't going on the mission after the change of code and begins the registration of mission 4.

At 19:50 registration of mission 4. completed.

### Day changes Sun 18.9.2016

At 00:18 ETU3221 consults FH 90 physician about giving medication, they are on a B772-mission. The patient is a 2.5 year-old boy with developmental delays and epilepsy. The parents have given 5 mg of midazolam buccally and the paramedics have given 2.5 mg x 3 i.v. of Stesolid. Regardless of this, the seizure continues, has already lasted for 15 min. In light of phone talk FH90 doc decides to join the mission at 00:21.

At 00:22 FH90 physician calls study town's emergency response centre and reports that the code for ETU3221's mission has changed to A772. Requests that FH90 join the mission.

## **At 00:23 Study town's emergency response centre dispatches on mission 5.**

### **Mission 5. + ATTACHMENTS (FH-form and SV210)**

*Study town's emergency response centre dispatches on 18.9.2016 at 00:23*

*"A772 Tutkimuskatu 10 [Study street 10], Study town; beginning of call 00:06; 2-year-old child patient, epilepsy; ETU 3221, FH90"*

#### *Description of the situation:*

*FH 90 departs on the mission with ground unit at 00:23. The ground unit is used because weather prevents flying the copter. The patient is encountered on the way along the freeway at 00:42. Patient's seizure has abated, lying on his side eyes closed, breathing spontaneously without problems. Doesn't open eyes, makes sounds, reacts to pain with movement of both pairs of limbs. Gaze strays to the right. Stesolid 2.5 mg i.v. also administered.*



Transportation continues at 00:44, FH 90 physician escorts with ETU 3221. The patient is lying on his side, breathing spontaneously. At 00:45 physician calls the paediatrician on-call at the study town university hospital, who advises to go directly to paediatric ICU. When approaching the hospital, the patient is clearly waking up, opens eyes and seems to be making eye contact, makes sounds and moves all limbs. According to the mother the situation already seems very normal, in any case the child can't yet speak. The patient is handed over to the paediatric ICU at 01:30 in good condition.

**At 01:38 returning with ground unit from mission 5, when study town's emergency response centre dispatches on mission 6**

**Mission 6. + ATTACHMENTS (FH-form)**

Study town's emergency response centre dispatches on 18.9.2016 at 01:50.

"A752, Hämäräkuja 16 F 78 [Dark street 16 F 78], study town; injected with fentanyl, not breathing; ETU1221, ETU01, FH90"

Description of the situation:

FH90 responds to the mission while on return journey at 01:50. The scene is close by so the journey continues by car. Arrival at the scene as the first EMS unit at 01:54, patient encountered at 01:55. The patient is a youngish male "Pate", identity not established. A friend says that "Pate" injected fentanyl shortly before the beginning of emergency call. When "Pate" lost consciousness and his face began to turn blue the friend had called the emergency response centre.

Patient's respiration rate is 4/min. FH90 doc initiates mask ventilation. ETU1221 and ETU01 are soon assisting at the scene. I.V. access is established, and he gets 0.4 mg i.v. naloxone on doc's orders. With this, the patient quickly regains consciousness and starts breathing spontaneously. Vital signs are ok, no external trauma discovered. The patient totally refuses to go anywhere for treatment. Says that he accidentally injected too much fenta and promises not to inject anything more. 0.8 mg i.m. of naloxone is administered and the scene becomes X-6 [patient refuses transportation] at 02:17.

At 02:42 back at base with ground unit. Supplies replenished.

At 02:59 replenishing of supplies completed.

At 03:12 registration of mission 5. is started

At 03:25 registration of mission 5. completed and the registration of mission 6. is begun

At 03:50 registration of mission 6. completed

At 09:00 report to the next doc on call

At 09:30 the shift ends

|                                                                                                                                                                                                                                                                           |                                                                                                   |                                                                 |                                                                                                                                    |                                                                                                                         |                                                                                                                                                    |                                                                                                                                                                                                                                                |                                                                                   |                          |
|---------------------------------------------------------------------------------------------------------------------------------------------------------------------------------------------------------------------------------------------------------------------------|---------------------------------------------------------------------------------------------------|-----------------------------------------------------------------|------------------------------------------------------------------------------------------------------------------------------------|-------------------------------------------------------------------------------------------------------------------------|----------------------------------------------------------------------------------------------------------------------------------------------------|------------------------------------------------------------------------------------------------------------------------------------------------------------------------------------------------------------------------------------------------|-----------------------------------------------------------------------------------|--------------------------|
| <input type="checkbox"/> Kuopio<br><input type="checkbox"/> Tampere                                                                                                                                                                                                       |                                                                                                   | <input type="checkbox"/> Oulu<br><input type="checkbox"/> Turku |                                                                                                                                    | <input type="checkbox"/> Rovaniemi<br><input type="checkbox"/> Vantaa<br><input checked="" type="checkbox"/> STUDY BASE |                                                                                                                                                    | Mission ID                                                                                                                                                                                                                                     | Dispatch code<br>??                                                               | Transp / canc code<br>?? |
| Date<br>17.9.2016                                                                                                                                                                                                                                                         | Scene address<br>TUTKIMUSKATU                                                                     |                                                                 |                                                                                                                                    | <input type="checkbox"/> = home address<br>Emerg call 14:00                                                             |                                                                                                                                                    | Amb ETO 1221                                                                                                                                                                                                                                   | <input type="checkbox"/> Ground unit<br><input checked="" type="checkbox"/> Other |                          |
| Patient name<br>RYHÄNEN PASI                                                                                                                                                                                                                                              |                                                                                                   |                                                                 | Municipality<br>TUTKIMUSKAUPUNKI                                                                                                   |                                                                                                                         | Alarm                                                                                                                                              | ??                                                                                                                                                                                                                                             |                                                                                   |                          |
| Identity number<br>72 YEARS OLD                                                                                                                                                                                                                                           | Home municipality / country<br>TUTKIMUSKAUPUNKI                                                   |                                                                 | Dispatcher ??                                                                                                                      |                                                                                                                         | On scene                                                                                                                                           | 14:27                                                                                                                                                                                                                                          |                                                                                   |                          |
| Hospital<br>49                                                                                                                                                                                                                                                            | Reported / scene<br><input checked="" type="checkbox"/> Police<br><input type="checkbox"/> Family |                                                                 | Point of departure<br>Station other                                                                                                |                                                                                                                         | At patient                                                                                                                                         | 14:29                                                                                                                                                                                                                                          |                                                                                   |                          |
|                                                                                                                                                                                                                                                                           | Tel                                                                                               |                                                                 |                                                                                                                                    |                                                                                                                         | Transp start                                                                                                                                       | 14:57                                                                                                                                                                                                                                          |                                                                                   |                          |
| Transportation<br><input checked="" type="checkbox"/> Amb + <input checked="" type="checkbox"/> DOC/param. <input type="checkbox"/> Helicopter                                                                                                                            |                                                                                                   |                                                                 | HBS 0-8<br>??                                                                                                                      |                                                                                                                         | At hospital                                                                                                                                        | 15:20                                                                                                                                                                                                                                          |                                                                                   |                          |
| <input type="checkbox"/> Other                                                                                                                                                                                                                                            |                                                                                                   |                                                                 |                                                                                                                                    |                                                                                                                         | Free                                                                                                                                               | 15:30                                                                                                                                                                                                                                          |                                                                                   |                          |
| Physician / paramedic<br>STUDY PHYSICIAN                                                                                                                                                                                                                                  |                                                                                                   |                                                                 |                                                                                                                                    |                                                                                                                         | Mission end                                                                                                                                        | ??                                                                                                                                                                                                                                             |                                                                                   |                          |
| Description of the situation<br>PATIENT COLLIDED IN HIS CAR WITH A LAMP-POST. LOW TRAUMA ENERGY. NO PULSE WHEN MET BY ETO 1221, PRIMARY RHYTHM VF.                                                                                                                        |                                                                                                   |                                                                 |                                                                                                                                    |                                                                                                                         |                                                                                                                                                    |                                                                                                                                                                                                                                                |                                                                                   |                          |
| Primary impression<br>ETO 1221 ALS RESUSCITATION. 1-BEL PLACED, VENTILATES WELL. 2X DEFIBRILLATED. ROSC 12 MINUTES. RR 120/60, FA 140, SpO2 99, NO SPONTANEOUS BREATHING. SYMMETRICAL, SMALL PUPILS, NO REACTION TO LIGHT. ECG SHOWS FA 102.                              |                                                                                                   |                                                                 |                                                                                                                                    |                                                                                                                         |                                                                                                                                                    |                                                                                                                                                                                                                                                |                                                                                   |                          |
| Response to treatment<br>ANAESTHETIC INTUBATION (VIDEOLARYNGOSCOPE + BOUGIE), IO AND IV ALLES, NORADRENALINE INFUSION, ARTERIAL LINE + PRESSURE MONITOR.                                                                                                                  |                                                                                                   |                                                                 |                                                                                                                                    |                                                                                                                         |                                                                                                                                                    |                                                                                                                                                                                                                                                |                                                                                   |                          |
| Primary diseases, home medication<br>NOT KNOWN.                                                                                                                                                                                                                           |                                                                                                   |                                                                 |                                                                                                                                    |                                                                                                                         |                                                                                                                                                    |                                                                                                                                                                                                                                                |                                                                                   |                          |
| Trauma patient                                                                                                                                                                                                                                                            |                                                                                                   |                                                                 |                                                                                                                                    |                                                                                                                         | GCS                                                                                                                                                |                                                                                                                                                                                                                                                |                                                                                   |                          |
| <input checked="" type="checkbox"/> open fracture<br><input type="checkbox"/> fracture<br><input checked="" type="checkbox"/> fracture / laceration / tenderness<br><input type="checkbox"/> deep / penetrating injury<br><input checked="" type="checkbox"/> no findings |                                                                                                   |                                                                 |                                                                                                                                    |                                                                                                                         | 14:29                                                                                                                                              |                                                                                                                                                                                                                                                |                                                                                   |                          |
| 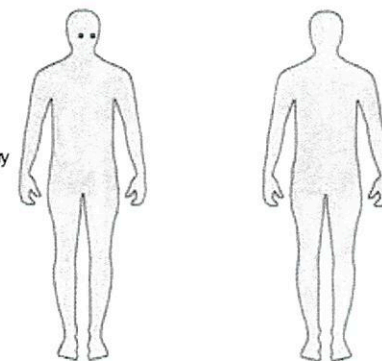                                                                                                                                                                                       |                                                                                                   |                                                                 |                                                                                                                                    |                                                                                                                         | Eye-opening 1-4<br>4 spontaneously<br>3 to speech<br>2 to pain<br>1 no response                                                                    |                                                                                                                                                                                                                                                |                                                                                   |                          |
|                                                                                                                                                                                                                                                                           |                                                                                                   |                                                                 |                                                                                                                                    |                                                                                                                         | Verbal response 1-5<br>5 oriented<br>4 confused<br>3 inappropriate words<br>2 sounds<br>1 no response                                              |                                                                                                                                                                                                                                                |                                                                                   |                          |
| Working diagnosis<br>RESUSCITATION WITH ROSC                                                                                                                                                                                                                              |                                                                                                   |                                                                 |                                                                                                                                    |                                                                                                                         | Motor response 1-6<br>6 obeys commands<br>5 moves to pain<br>4 withdrawal from pain<br>3 abnormal flexion<br>2 abnormal extension<br>1 no response |                                                                                                                                                                                                                                                |                                                                                   |                          |
|                                                                                                                                                                                                                                                                           |                                                                                                   |                                                                 |                                                                                                                                    |                                                                                                                         | Total 3                                                                                                                                            |                                                                                                                                                                                                                                                |                                                                                   |                          |
| Resuscitation                                                                                                                                                                                                                                                             |                                                                                                   |                                                                 | Primary rhythm                                                                                                                     |                                                                                                                         |                                                                                                                                                    | Acute coronary event                                                                                                                                                                                                                           |                                                                                   |                          |
| <input type="checkbox"/> Witnessed OHCA ?<br><input type="checkbox"/> During treatment<br><input type="checkbox"/> Unwitnessed OHCA<br><input type="checkbox"/> Bystander CPR<br><input type="checkbox"/> No ACLS, reason                                                 |                                                                                                   |                                                                 | <input checked="" type="checkbox"/> VF <input type="checkbox"/> PEA<br><input type="checkbox"/> ASY <input type="checkbox"/> Other |                                                                                                                         |                                                                                                                                                    | Ecg at _____<br>Ecg at _____<br>Pain started app. at _____<br>Continuous pain at _____                                                                                                                                                         |                                                                                   |                          |
| <input type="checkbox"/> Temporary ROSC at _____                                                                                                                                                                                                                          |                                                                                                   |                                                                 | Delays since the start of call (min):<br>First response FinnHEMS<br>1. DC 8 ROSC 12<br>, permanent at 14:12                        |                                                                                                                         |                                                                                                                                                    | Delay of thrombolysis _____ min thrombolysis at _____<br>since the start / aggravation of pain <input type="checkbox"/> contraindication check<br><input type="checkbox"/> PCI/ UAP -treatment <input type="checkbox"/> Cardiolog consultation |                                                                                   |                          |



# MISSION 2.

|                    |                                                                                                                                                                                                                                                 | 14:30                    | 15:00      | 15:30 |         |          |
|--------------------|-------------------------------------------------------------------------------------------------------------------------------------------------------------------------------------------------------------------------------------------------|--------------------------|------------|-------|---------|----------|
| Vital functions    | Pain <u>2</u> <u>80</u> kg                                                                                                                                                                                                                      |                          |            |       |         |          |
|                    | RR $\nabla$<br>$\blacktriangle$                                                                                                                                                                                                                 |                          |            |       |         |          |
|                    | Heart rate •                                                                                                                                                                                                                                    |                          |            |       |         |          |
|                    | A. rad/ A. car (+/-)                                                                                                                                                                                                                            |                          |            |       |         |          |
|                    | Respiration rate                                                                                                                                                                                                                                | 12                       | 14         | 16    | 16      | 16       |
|                    | Breath sounds                                                                                                                                                                                                                                   |                          | +/+        |       |         |          |
|                    | Rhythm                                                                                                                                                                                                                                          | FA                       |            | FA    | FA      |          |
|                    | EtCO <sub>2</sub> (kPa)                                                                                                                                                                                                                         | 4,9                      | 5,8        | 5,6   | 4,2     |          |
|                    | SpO <sub>2</sub> (%)                                                                                                                                                                                                                            | 99                       | 84 99      | 97    | 97      | 97       |
|                    | Gluc / pain                                                                                                                                                                                                                                     |                          |            |       | 6,2 / - |          |
|                    | Temperature                                                                                                                                                                                                                                     |                          |            |       |         |          |
|                    |                                                                                                                                                                                                                                                 |                          |            |       |         | Yhteensä |
|                    | Medication                                                                                                                                                                                                                                      | alfentan / fentan. (mg)  |            | 0,2   | 0,1     |          |
|                    |                                                                                                                                                                                                                                                 | morphine/ oxycodone (mg) |            |       |         |          |
|                    |                                                                                                                                                                                                                                                 | adrenaline (mg)          |            |       |         |          |
| propofol (mg)      |                                                                                                                                                                                                                                                 |                          | 50         |       |         |          |
| suxamethonium (mg) |                                                                                                                                                                                                                                                 |                          |            |       |         |          |
| rocuronium (mg)    |                                                                                                                                                                                                                                                 |                          | 80         |       |         |          |
| EFEDRIN (MG)       |                                                                                                                                                                                                                                                 |                          |            |       |         |          |
| Fluids             | noradr. 0,04 mg/ml (ml/h)                                                                                                                                                                                                                       |                          | 10 ml/hour |       |         |          |
|                    | propofol 10/20 mg/ml (ml/h)                                                                                                                                                                                                                     |                          | 10 ml/hour |       |         |          |
|                    | Ringer NaCl 500 ml                                                                                                                                                                                                                              | -----                    |            |       |         |          |
|                    | Ringer NaCl 500 ml                                                                                                                                                                                                                              | -----                    |            |       |         |          |
|                    | Kolloidi _____ ml                                                                                                                                                                                                                               |                          |            |       |         |          |
| Interventions      | Blood gases time <u>14:45</u> pH <u>7,19</u> pCO <sub>2</sub> <u>6,0</u> pO <sub>2</sub> <u>120</u> BE <u>5,0</u> Hb <u>141</u> K <u>3,8</u> Na <u>139</u>                                                                                      |                          |            |       |         |          |
|                    | <input checked="" type="checkbox"/> Art. can. rad. dx/ sin <u>8,0</u> <input type="checkbox"/> NGT, no. _____ <input checked="" type="checkbox"/> io-access: tibia/ humerus(dx)/ sin _____ <input type="checkbox"/> Other _____ STUDY PHYSICIAN |                          |            |       |         |          |
|                    | Intubation/ SAD no. _____, attempts <u>1</u> , depth <u>24</u> cm, time <u>14:40</u> Intubator, Resp. mode: CPAP/ BiPAP/ IPPV/ SIMV FIO <sub>2</sub> <u>50</u> % V. vol. <u>500</u> ml Fr. <u>14</u> /min IPAP _____ EPAP/PEEP <u>5</u>         |                          |            |       |         |          |



MISSION 2.

|                                                                                                                                                                                    |  |                                                                                                                                                                                          |  |                                                                                                                                                                                                                 |  |                                                                      |  |
|------------------------------------------------------------------------------------------------------------------------------------------------------------------------------------|--|------------------------------------------------------------------------------------------------------------------------------------------------------------------------------------------|--|-----------------------------------------------------------------------------------------------------------------------------------------------------------------------------------------------------------------|--|----------------------------------------------------------------------|--|
| Identity number 72 YEARS OLD                                                                                                                                                       |  | Travel date 17.09.16                                                                                                                                                                     |  | Unit ETU 1221                                                                                                                                                                                                   |  | Running no                                                           |  |
| Subscribed <input checked="" type="checkbox"/> dispatch center <input type="checkbox"/> other, what? Origin <input type="checkbox"/> station <input type="checkbox"/> other, what? |  | Scene address <input type="checkbox"/> = home address <input type="checkbox"/> Onward transp                                                                                             |  | Dispatch code B 202                                                                                                                                                                                             |  | Transp / canc code ???                                               |  |
| Emergency call 1400                                                                                                                                                                |  | Patient name RYHANEN PASI                                                                                                                                                                |  | TUTKIMUSKATU,<br>TUUKIMUSKAUPUNKI                                                                                                                                                                               |  | Driving km total                                                     |  |
| Mission start 1401                                                                                                                                                                 |  | Patient on additional place <input type="checkbox"/> on stretchers <input type="checkbox"/> sitting                                                                                      |  | Home address (street and city)                                                                                                                                                                                  |  | Home municipality <input type="checkbox"/> Foreigner / form attached |  |
| On scene 1406                                                                                                                                                                      |  | Reference no                                                                                                                                                                             |  | Cause of transport                                                                                                                                                                                              |  | No Kela reimbursement                                                |  |
| At patient 1407                                                                                                                                                                    |  | Cause of transport <input checked="" type="checkbox"/> Illness or pregnancy                                                                                                              |  | Registration number A132123                                                                                                                                                                                     |  | Basic fee -20 km                                                     |  |
| Transport 1457                                                                                                                                                                     |  | Cause of transport <input checked="" type="checkbox"/> Motor vehicle accident *)                                                                                                         |  | Accident at work *)                                                                                                                                                                                             |  | Invoiceable extra kilometres km                                      |  |
| Patient released 1530                                                                                                                                                              |  | Cause of transport *) Insurance company                                                                                                                                                  |  | To be invoiced where?                                                                                                                                                                                           |  | 2. ambulance driver h min                                            |  |
| Mission end                                                                                                                                                                        |  | Description of the situation. Primary reason (symptom or seizure/arrest, mechanism of injury; time of start or event), eye witness's contact information                                 |  | A PASSER -BY TELEPHONED. A SMALL FIAT HAD COLLIDED WITH A LAMP-POST. THE DRIVER IS IN THE VEHICLE. SPEED LIMIT AT THE SITE 40 KM/H DVZ. ACCORDING TO AN EYEWITNESS THE SPEED OF THE VEHICLE WAS LESS THAN THIS. |  | Waiting time (over 1hr) h min                                        |  |
| Primary impression (symptom, trauma-related findings)                                                                                                                              |  | THE PATIENT SEATED IN THE DRIVER'S SEAT IN SEATBELT. AIRBAGS NOT ACTIVATED. SMALL DENT IN THE FRONT BUMPER BAR. NO OTHER DAMAGE TO CAR. PATIENT PULSELESS WHEN MET.                      |  | In total                                                                                                                                                                                                        |  | Excess                                                               |  |
| Diseases, current medication, drug allergies, previous hospital treatment                                                                                                          |  | NOT KNOWN.                                                                                                                                                                               |  | Invoiced from Kela                                                                                                                                                                                              |  | Euros                                                                |  |
| MONITORING AT                                                                                                                                                                      |  | BLOOD PRESS.                                                                                                                                                                             |  | HEART RATE                                                                                                                                                                                                      |  | RHYTHM                                                               |  |
| When met A 14:28                                                                                                                                                                   |  | -                                                                                                                                                                                        |  | -                                                                                                                                                                                                               |  | VF                                                                   |  |
| B 14:12                                                                                                                                                                            |  | 130/62                                                                                                                                                                                   |  | 140                                                                                                                                                                                                             |  | FA                                                                   |  |
| C 14:30                                                                                                                                                                            |  | 120/60                                                                                                                                                                                   |  | 102                                                                                                                                                                                                             |  | FA                                                                   |  |
| Patient 15:30 handover D                                                                                                                                                           |  | 120/70                                                                                                                                                                                   |  | 110                                                                                                                                                                                                             |  | FA                                                                   |  |
| Treatment (interventions, medication) and response.                                                                                                                                |  | Consultation with physic. <input type="checkbox"/> Physician on scene. <input checked="" type="checkbox"/>                                                                               |  | Physician's name and position. Instructions for treatment                                                                                                                                                       |  | REMOVED FROM THE VEHICLE ON TO FH90 STUDY PHYSICIAN                  |  |
| Signature of person refusing treatment / transportation                                                                                                                            |  | Signature and number of person giving treatment                                                                                                                                          |  | Numbers of other personnel                                                                                                                                                                                      |  | Name and phone number of next of kin                                 |  |
| DECLARATION OF THE HEALTH CARE FACILITY                                                                                                                                            |  | I hereby declare based on the previous report that the patient's physical condition <input type="checkbox"/> requires <input type="checkbox"/> doesn't require ambulance transportation. |  | Signature, clarification of signature and position of the person receiving the patient                                                                                                                          |  | Name and stamp of the receiving facility                             |  |



MISSION 3.

|                                                                                                                                                           |                             |                                                                                                                                      |  |                                                                                                                         |  |              |                                                                                   |                         |
|-----------------------------------------------------------------------------------------------------------------------------------------------------------|-----------------------------|--------------------------------------------------------------------------------------------------------------------------------------|--|-------------------------------------------------------------------------------------------------------------------------|--|--------------|-----------------------------------------------------------------------------------|-------------------------|
| <input type="checkbox"/> Kuopio<br><input type="checkbox"/> Tampere                                                                                       |                             | <input type="checkbox"/> Oulu<br><input type="checkbox"/> Turku                                                                      |  | <input type="checkbox"/> Rovaniemi<br><input type="checkbox"/> Vantaa<br><input checked="" type="checkbox"/> STUDY BASE |  | Mission ID   | Dispatch code<br>A203                                                             | Transp / canc code<br>? |
| Date<br>17.9.2016                                                                                                                                         | Scene address<br>JALTAJÄYLÄ |                                                                                                                                      |  | <input type="checkbox"/> = home address<br>Emerg call 16:17                                                             |  | Amb          | <input type="checkbox"/> Ground unit<br><input checked="" type="checkbox"/> Other |                         |
| Patient name<br>ESKOLA RAMI                                                                                                                               |                             | Municipality<br>TUTKIMUSKAUPUNKI                                                                                                     |  | Alarm                                                                                                                   |  | 16:18        |                                                                                   |                         |
| Identity number<br>27 YEARS OLD                                                                                                                           |                             | Home municipality / country<br>TUTKIMUSKAUPUNKI                                                                                      |  | Dispatcher<br>HÄKE                                                                                                      |  | On scene     |                                                                                   | 16:32                   |
| Hospital<br>Y9                                                                                                                                            |                             | <input checked="" type="checkbox"/> Reported/ scene<br><input checked="" type="checkbox"/> Police<br><input type="checkbox"/> Family |  | <input checked="" type="checkbox"/> Point of departure<br>Station/other                                                 |  | At patient   |                                                                                   | 16:35                   |
| Tel                                                                                                                                                       |                             |                                                                                                                                      |  |                                                                                                                         |  | Transp start |                                                                                   | 16:45                   |
| <input type="checkbox"/> Amb +<br><input type="checkbox"/> DOC/param.<br><input checked="" type="checkbox"/> Helicopter<br><input type="checkbox"/> Other |                             | HBS 0-8<br>??                                                                                                                        |  | At hospital                                                                                                             |  |              |                                                                                   | 17:05                   |
|                                                                                                                                                           |                             |                                                                                                                                      |  | Free                                                                                                                    |  |              |                                                                                   | 17:15                   |
| Physician/ paramedic<br>STUDY PHYSICIAN                                                                                                                   |                             |                                                                                                                                      |  | Mission end                                                                                                             |  | ??           |                                                                                   |                         |

Description of the situation  
 HEAD-ON COLLISION INVOLVING 2 CARS. ONE THE RIGHT WAY UP IN THE DITCH, THE OTHER ON ITS LEFT SIDE IN THE DITCH. 4 PERSONS AFFECTED.

Primary impression  
 PATIENTS TRIAGE: 2 x GREEN, 1 x YELLOW, 1 x RED. RED PATIENT THE DRIVER OF SKODA, ALONE IN THE VEHICLE, SEATBELT ON. CAR ON ITS LEFT SIDE, EXTENSIVELY OUT OF SHAPE. RESCUE RELEASES PATIENT, UNCONSCIOUS IN CAR, OPENS EYES AS SET TO SPINE BOARD, MOVES HANDS, GROANS.

Response to treatment  
 "LOAD AND GO" BY HELICOPTER, I.V. ACCESS -> REHYDRATION REGAINS CONSCIOUSNESS. E FAST EW ROUTE & BLOOD AROUND THE LIVER.

Primary diseases, home medication  
 NOT ALLERGY, OTHERWISE HEALTHY.

|                                                                                                                                                                                                                                                                                           |  |                                                                                     |  |                                                                                                                                                    |  |  |  |       |       |       |  |  |
|-------------------------------------------------------------------------------------------------------------------------------------------------------------------------------------------------------------------------------------------------------------------------------------------|--|-------------------------------------------------------------------------------------|--|----------------------------------------------------------------------------------------------------------------------------------------------------|--|--|--|-------|-------|-------|--|--|
| Trauma patient<br><input checked="" type="checkbox"/> open fracture<br><input type="checkbox"/> fracture<br><input checked="" type="checkbox"/> fracture / laceration / tenderness<br><input type="checkbox"/> deep/penetrating injury<br><input checked="" type="checkbox"/> no findings |  | 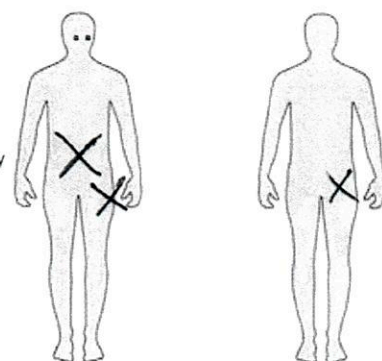 |  | GCS<br>Eye-opening 1-4<br>4 spontaneously<br>3 to speech<br>2 to pain<br>1 no response                                                             |  |  |  | 16:37 | 16:42 | 17:00 |  |  |
|                                                                                                                                                                                                                                                                                           |  |                                                                                     |  | Verbal response 1-5<br>5 oriented<br>4 confused<br>3 inappropriate words<br>2 sounds<br>1 no response                                              |  |  |  | 4     | 4     | 4     |  |  |
|                                                                                                                                                                                                                                                                                           |  |                                                                                     |  | Motor response 1-6<br>6 obeys commands<br>5 moves to pain<br>4 withdrawal from pain<br>3 abnormal flexion<br>2 abnormal extension<br>1 no response |  |  |  | 2     | 4     | 5     |  |  |
|                                                                                                                                                                                                                                                                                           |  |                                                                                     |  | Total                                                                                                                                              |  |  |  | 11    | 14    | 15    |  |  |

Working diagnosis: BLOOD IN THE ABDOMEN

|                                                                                                                                                                                                                                                                                                                               |  |                                                                                                                                                                                                                                                      |  |                                                                                                                                                                                                                                                                                                                                                                                                   |  |  |  |
|-------------------------------------------------------------------------------------------------------------------------------------------------------------------------------------------------------------------------------------------------------------------------------------------------------------------------------|--|------------------------------------------------------------------------------------------------------------------------------------------------------------------------------------------------------------------------------------------------------|--|---------------------------------------------------------------------------------------------------------------------------------------------------------------------------------------------------------------------------------------------------------------------------------------------------------------------------------------------------------------------------------------------------|--|--|--|
| <b>Resuscitation</b><br><input type="checkbox"/> Witnessed OHCA<br><input type="checkbox"/> During treatment<br><input type="checkbox"/> Unwitnessed OHCA<br><input type="checkbox"/> Bystander CPR<br><input type="checkbox"/> No ACLS, reason _____<br><input type="checkbox"/> Temporary ROSC at _____, permanent at _____ |  | <b>Primary rhythm</b><br><input type="checkbox"/> VF <input type="checkbox"/> PEA<br><input type="checkbox"/> ASY <input type="checkbox"/> Other _____<br>Delays since the start of call (min):<br>First response FinnHEMS<br>1. DC _____ ROSC _____ |  | <b>Acute coronary event</b><br>Ecg at _____<br>Ecg at _____<br>Pain started app. at _____<br>Continuous pain at _____<br>Delay of thrombolysis _____ min thrombolysis at _____<br><input type="checkbox"/> since the start / aggravation of pain <input type="checkbox"/> contraindication check<br><input type="checkbox"/> PCI/ UAP -treatment <input type="checkbox"/> Cardiology consultation |  |  |  |
|-------------------------------------------------------------------------------------------------------------------------------------------------------------------------------------------------------------------------------------------------------------------------------------------------------------------------------|--|------------------------------------------------------------------------------------------------------------------------------------------------------------------------------------------------------------------------------------------------------|--|---------------------------------------------------------------------------------------------------------------------------------------------------------------------------------------------------------------------------------------------------------------------------------------------------------------------------------------------------------------------------------------------------|--|--|--|



MISSION 3.

|                                                                                                                                     |                    |          |       |       |       |
|-------------------------------------------------------------------------------------------------------------------------------------|--------------------|----------|-------|-------|-------|
| Pain <u>285</u> kg                                                                                                                  |                    | Amb      | 16:30 | 17:00 | 17:30 |
| Vital functions                                                                                                                     |                    | FinnHEMS |       |       |       |
| RR                                                                                                                                  | 200                |          |       |       |       |
| Heart rate                                                                                                                          | 180                |          |       |       |       |
|                                                                                                                                     | 160                |          |       |       |       |
|                                                                                                                                     | 140                |          |       |       |       |
|                                                                                                                                     | 120                |          |       |       |       |
|                                                                                                                                     | 100                |          |       |       |       |
|                                                                                                                                     | 80                 |          |       |       |       |
|                                                                                                                                     | 60                 |          |       |       |       |
|                                                                                                                                     | 40                 |          |       |       |       |
| A.rad/ A.car (+/-)                                                                                                                  |                    |          |       |       |       |
| Respiration rate                                                                                                                    | 28                 |          |       |       |       |
| Breath sounds                                                                                                                       | +/+                |          |       |       |       |
| Rhythm                                                                                                                              | SINUS, TACHYCARDIA |          |       |       |       |
| EICO <sub>2</sub> (kPa)                                                                                                             |                    |          |       |       |       |
| SpO <sub>2</sub> (%)                                                                                                                | 92 94 96           |          |       |       |       |
| Gluc/pain                                                                                                                           | 9 6 4              |          |       |       |       |
| Temperature                                                                                                                         |                    |          |       |       |       |
|                                                                                                                                     |                    | Yhteensä |       |       |       |
| Medication                                                                                                                          |                    |          |       |       |       |
| alfentan./ fentan. (mg)                                                                                                             |                    |          |       |       |       |
| morphine/ oxycodone (mg)                                                                                                            | 5                  |          |       |       |       |
| adrenaline (mg)                                                                                                                     |                    |          |       |       |       |
| propofol (mg)                                                                                                                       |                    |          |       |       |       |
| suxamethonium (mg)                                                                                                                  |                    |          |       |       |       |
| rocuronium (mg)                                                                                                                     |                    |          |       |       |       |
|                                                                                                                                     |                    |          |       |       |       |
| Fluids                                                                                                                              |                    |          |       |       |       |
| noradr. _____ mg/ml (ml/h)                                                                                                          |                    |          |       |       |       |
| propofol 10/20 mg/ml (ml/h)                                                                                                         |                    |          |       |       |       |
| Ringer/NaCl <u>500</u> ml                                                                                                           |                    |          |       |       |       |
| Ringer/NaCl <u>500</u> ml                                                                                                           |                    |          |       |       |       |
| Kolloidi _____ ml                                                                                                                   |                    |          |       |       |       |
| Interventions                                                                                                                       |                    |          |       |       |       |
| Blood gases time _____ pH _____ pCO <sub>2</sub> _____ pO <sub>2</sub> _____ BE _____ Hb _____ K _____ Na _____                     |                    |          |       |       |       |
| <input checked="" type="checkbox"/> Art. can. rad. dx/ sin <u>ATTEMPT</u> , <input type="checkbox"/> NGT, no <u>DOESN'T SUCCEED</u> |                    |          |       |       |       |
| <input type="checkbox"/> io-access: tibia/ humerus dx/ sin                                                                          |                    |          |       |       |       |
| <input checked="" type="checkbox"/> Other <u>eFAST 16:49 = BLOOD IN ABDOMEN</u>                                                     |                    |          |       |       |       |
| Intubation/ SAD no _____, depth _____ cm, time _____                                                                                |                    |          |       |       |       |
| Intubator, Resp. mode: CPAP/                                                                                                        |                    |          |       |       |       |
| BIPAP/ IPPV/ SIMV FiO <sub>2</sub> _____ % V. vol: _____                                                                            |                    |          |       |       |       |
| ml Fr: _____ /min                                                                                                                   |                    |          |       |       |       |
| IPAP _____                                                                                                                          |                    |          |       |       |       |
| EPAP/PEEP _____                                                                                                                     |                    |          |       |       |       |



MISSION 3

|                                                                                                            |                                                                                           |                      |                                                                                                     |                                                                                |                                |
|------------------------------------------------------------------------------------------------------------|-------------------------------------------------------------------------------------------|----------------------|-----------------------------------------------------------------------------------------------------|--------------------------------------------------------------------------------|--------------------------------|
| Identity number 38 YEARS OLD                                                                               |                                                                                           | Travel date 17.09.16 |                                                                                                     | Unit ETU 1231/LS                                                               | Running no                     |
| Subscribe <input checked="" type="checkbox"/> dispatch center <input type="checkbox"/> other, what? Origin |                                                                                           | Scene address        |                                                                                                     | <input type="checkbox"/> = home address <input type="checkbox"/> Onward transp |                                |
| Emergency call 1618                                                                                        | Patient name JUUSELA MIRJA                                                                |                      | VALTAVÄYLÄ<br>OHITUSTIEN RAMPPI,<br>TUTKIMUSKAUPUNKI                                                |                                                                                |                                |
| Mission start 1618                                                                                         |                                                                                           |                      | Patient on additional place <input type="checkbox"/> on stretchers <input type="checkbox"/> sitting |                                                                                |                                |
| On scene 1624                                                                                              | Home address (street and city)                                                            |                      | Home municipality TUTKIMUSKAUPUNKI                                                                  |                                                                                |                                |
| At patient 1624                                                                                            |                                                                                           |                      | Reference no                                                                                        |                                                                                |                                |
| Transport                                                                                                  | Cause of transport                                                                        |                      | No Kela reimbursement                                                                               |                                                                                | Euros                          |
|                                                                                                            | Illness or pregnancy                                                                      |                      | <input type="checkbox"/> Care facility / hospital patient <input type="checkbox"/> Other            |                                                                                | Basic fee -20 km               |
| Patient released                                                                                           | <input checked="" type="checkbox"/> Motor vehicle accident *) Registration number XXX-123 |                      | To be invoiced where?                                                                               |                                                                                | Invoicable extra kilometres km |
|                                                                                                            | Accident at work *)                                                                       |                      |                                                                                                     |                                                                                | 2. ambulance driver h min      |
| Mission end                                                                                                | *) Insurance company OTHER PARTIKAVT SKODA AAA-123                                        |                      |                                                                                                     |                                                                                | Waiting time (over 1hr) h min  |

**Description of the situation.** Primary reason (symptom or seizure/arrest, mechanism of injury; time of start or event), eye witness's contact information  
 HEAD-ON COLLISION INVOLVING 2 CARS. 4 PERSONS AFFECTED. AUDI ON THE ROAD RIGHT WAY UP. SKODA IS LEFT SIDE IN THE DITCH. BOTH BONNETS BADLY OUT OF SHAPE. 100 KM/HOUR IN THE AREA

**Primary impression** (symptom, trauma-related findings)  
 TWO PATIENTS TRIAGED GREEN ON THE BACK SEAT EXITED THE CAR UNAIDED BY THEMSELVES. AMBULATORY, NO PAIN. AUDI DRIVER TRIAGED YELLOW STUCK ON THE FRONTSEAT, CONSCIOUS, NO PAIN. SKODA DRIVER TRIAGED RED, STUCK, NO RESPONSE, BREATHING, A. RAD+

Diseases, current medication, drug allergies, previous hospital treatment

| MONITORING AT       | BLOOD PRESS. | HEART RATE | RHYTHM | RESPIRAT. RATE | RESPIRAT. AUSCULT. | PEF | ETCO <sub>2</sub> | SpO <sub>2</sub> | CONSCIOUSNESS (GCS) Eyes Verbal Motor | PAIN 0-10 | B-gluc | ALC. METER | TEMPERATURE, from where |
|---------------------|--------------|------------|--------|----------------|--------------------|-----|-------------------|------------------|---------------------------------------|-----------|--------|------------|-------------------------|
| When met A 16:25    | A, RAD+      | ~100       |        | ~20            |                    |     |                   |                  | 4 5 6 0                               |           |        |            |                         |
| B                   |              |            |        |                |                    |     |                   |                  |                                       |           |        |            |                         |
| C                   |              |            |        |                |                    |     |                   |                  |                                       |           |        |            |                         |
| Patient handover, D |              |            |        |                |                    |     |                   |                  |                                       |           |        |            |                         |

**Treatment** (interventions, medication) and response.  Consultation with physio.  Physician on scene. Physician's name and position. Instructions for treatment  
 FH90 STUDY PHYSICIAN

- FH 90 → RED PATIENT
- ETU 1231 → YELLOW PATIENT (MIRJA)
- ETU 2221 → GREEN PATIENT (JUUSELA KYLLIKKI)
- ETU 1241 → GREEN PATIENT (JUUSELA ERVVI)

Signature of person refusing treatment / transportation

Signature and number of person giving treatment Numbers of other personnel Name and phone number of next of kin  Information continues on another sheet

|                                         |                                                                                                                                                                                          |  |                                                    |
|-----------------------------------------|------------------------------------------------------------------------------------------------------------------------------------------------------------------------------------------|--|----------------------------------------------------|
| DECLARATION OF THE HEALTH CARE FACILITY | I hereby declare based on the previous report that the patient's physical condition <input type="checkbox"/> requires <input type="checkbox"/> doesn't require ambulance transportation. |  | Name and stamp of the receiving facility<br><br>79 |
|                                         | Signature, clarification of signature and position of the person receiving the patient                                                                                                   |  |                                                    |



MISSION 3.

|                                                                                                                                                                                                                          |  |                                                                                                                                                                                          |  |                                |  |                                                                                                                                                                                                                                       |  |                                          |  |                                                                                             |  |                             |  |  |  |
|--------------------------------------------------------------------------------------------------------------------------------------------------------------------------------------------------------------------------|--|------------------------------------------------------------------------------------------------------------------------------------------------------------------------------------------|--|--------------------------------|--|---------------------------------------------------------------------------------------------------------------------------------------------------------------------------------------------------------------------------------------|--|------------------------------------------|--|---------------------------------------------------------------------------------------------|--|-----------------------------|--|--|--|
| Identity number                                                                                                                                                                                                          |  | 74 YEARS OLD                                                                                                                                                                             |  | Travel date                    |  | 17.09.16                                                                                                                                                                                                                              |  | Unit                                     |  | ETU1241                                                                                     |  | Running no                  |  |  |  |
| Subscriber                                                                                                                                                                                                               |  | dispatch center                                                                                                                                                                          |  | other, what?                   |  | Origin                                                                                                                                                                                                                                |  | station                                  |  | other, what?                                                                                |  | Scene address               |  |  |  |
| Emergency call                                                                                                                                                                                                           |  | 1,618                                                                                                                                                                                    |  | Patient name                   |  | JUUSELA ERKKI                                                                                                                                                                                                                         |  | Dispatch code                            |  | A203                                                                                        |  | Transp / canc code          |  |  |  |
| Mission start                                                                                                                                                                                                            |  | 1,619                                                                                                                                                                                    |  | Mission end                    |  | 1,628                                                                                                                                                                                                                                 |  | Driving km total                         |  |                                                                                             |  |                             |  |  |  |
| On scene                                                                                                                                                                                                                 |  | 1,627                                                                                                                                                                                    |  | Home address (street and city) |  |                                                                                                                                                                                                                                       |  | Home municipality                        |  |                                                                                             |  | Foreigner / form attached   |  |  |  |
| At patient                                                                                                                                                                                                               |  | 1,628                                                                                                                                                                                    |  | Cause of transport             |  | <input type="checkbox"/> Illness or pregnancy<br><input checked="" type="checkbox"/> Motor vehicle accident *) Registration number <u>XXX-123</u><br><input type="checkbox"/> Accident at work *)<br>*) Insurance company <u>AUDI</u> |  | No Kela reimbursement                    |  | <input type="checkbox"/> Care facility / hospital patient<br><input type="checkbox"/> Other |  | Basic fee -20 km            |  |  |  |
| Patient released                                                                                                                                                                                                         |  |                                                                                                                                                                                          |  | Reference no                   |  |                                                                                                                                                                                                                                       |  | To be invoiced where?                    |  | Invoiceable extra kilometres km                                                             |  | Euros                       |  |  |  |
| Mission end                                                                                                                                                                                                              |  |                                                                                                                                                                                          |  | 2. ambulance driver            |  | h min                                                                                                                                                                                                                                 |  | Waiting time (over 1hr)                  |  | h min                                                                                       |  | In total                    |  |  |  |
| Description of the situation. Primary reason (symptom or seizure/arrest, mechanism of injury; time of start or event), eye witness's contact information                                                                 |  |                                                                                                                                                                                          |  |                                |  |                                                                                                                                                                                                                                       |  |                                          |  | Excess                                                                                      |  |                             |  |  |  |
| HEAD-ON COLLISION INVOLVING 2 CARS.                                                                                                                                                                                      |  |                                                                                                                                                                                          |  |                                |  |                                                                                                                                                                                                                                       |  |                                          |  | Invoiced from Kela                                                                          |  |                             |  |  |  |
| THE PERSON ON THE REAR SEAT OF THE UPRIGHT CAR, EXITED UNAIDED. TRIAGED AS GREEN.                                                                                                                                        |  |                                                                                                                                                                                          |  |                                |  |                                                                                                                                                                                                                                       |  |                                          |  |                                                                                             |  |                             |  |  |  |
| Primary impression (symptom, trauma-related findings)                                                                                                                                                                    |  |                                                                                                                                                                                          |  |                                |  |                                                                                                                                                                                                                                       |  |                                          |  | First-response unit on scene                                                                |  |                             |  |  |  |
| WALKING. PAIN - FREE. LUCID.                                                                                                                                                                                             |  |                                                                                                                                                                                          |  |                                |  |                                                                                                                                                                                                                                       |  |                                          |  |                                                                                             |  |                             |  |  |  |
| Diseases, current medication, drug allergies, previous hospital treatment                                                                                                                                                |  |                                                                                                                                                                                          |  |                                |  |                                                                                                                                                                                                                                       |  |                                          |  |                                                                                             |  |                             |  |  |  |
| MONITORING AT                                                                                                                                                                                                            |  |                                                                                                                                                                                          |  |                                |  |                                                                                                                                                                                                                                       |  |                                          |  |                                                                                             |  |                             |  |  |  |
| BLOOD PRESS.                                                                                                                                                                                                             |  | HEART RATE                                                                                                                                                                               |  | RHYTHM                         |  | RESPIRAT. RATE                                                                                                                                                                                                                        |  | RESPIRAT. AUSCULT.                       |  | PEF                                                                                         |  | ETCO <sub>2</sub>           |  |  |  |
| When met                                                                                                                                                                                                                 |  | A, RAD+                                                                                                                                                                                  |  |                                |  |                                                                                                                                                                                                                                       |  |                                          |  |                                                                                             |  | CONSCIOUSNESS (GCS)         |  |  |  |
| A 16:28                                                                                                                                                                                                                  |  |                                                                                                                                                                                          |  |                                |  |                                                                                                                                                                                                                                       |  |                                          |  |                                                                                             |  | Eyes Verbal Motor PAIN 0-10 |  |  |  |
| B                                                                                                                                                                                                                        |  |                                                                                                                                                                                          |  |                                |  |                                                                                                                                                                                                                                       |  |                                          |  |                                                                                             |  | 4 5 6 0                     |  |  |  |
| C                                                                                                                                                                                                                        |  |                                                                                                                                                                                          |  |                                |  |                                                                                                                                                                                                                                       |  |                                          |  |                                                                                             |  |                             |  |  |  |
| Patient handover. D                                                                                                                                                                                                      |  |                                                                                                                                                                                          |  |                                |  |                                                                                                                                                                                                                                       |  |                                          |  |                                                                                             |  |                             |  |  |  |
| Treatment (interventions, medication) and response. <input type="checkbox"/> Consultation with physio. <input checked="" type="checkbox"/> Physician on scene. Physician's name and position. Instructions for treatment |  |                                                                                                                                                                                          |  |                                |  |                                                                                                                                                                                                                                       |  |                                          |  |                                                                                             |  |                             |  |  |  |
| FH SO STUDY PHYSICIAN                                                                                                                                                                                                    |  |                                                                                                                                                                                          |  |                                |  |                                                                                                                                                                                                                                       |  |                                          |  |                                                                                             |  |                             |  |  |  |
| Signature of person refusing treatment / transportation                                                                                                                                                                  |  |                                                                                                                                                                                          |  |                                |  |                                                                                                                                                                                                                                       |  |                                          |  |                                                                                             |  |                             |  |  |  |
| Information continues on another sheet                                                                                                                                                                                   |  |                                                                                                                                                                                          |  |                                |  |                                                                                                                                                                                                                                       |  |                                          |  |                                                                                             |  |                             |  |  |  |
| Signature and number of person giving treatment                                                                                                                                                                          |  |                                                                                                                                                                                          |  | Numbers of other personnel     |  |                                                                                                                                                                                                                                       |  | Name and phone number of next of kin     |  |                                                                                             |  | Accompanied                 |  |  |  |
| DECLARATION OF THE HEALTH CARE FACILITY                                                                                                                                                                                  |  | I hereby declare based on the previous report that the patient's physical condition <input type="checkbox"/> requires <input type="checkbox"/> doesn't require ambulance transportation. |  |                                |  |                                                                                                                                                                                                                                       |  | Name and stamp of the receiving facility |  |                                                                                             |  |                             |  |  |  |
|                                                                                                                                                                                                                          |  | Signature, clarification of signature and position of the person receiving the patient                                                                                                   |  |                                |  |                                                                                                                                                                                                                                       |  | 79                                       |  |                                                                                             |  |                             |  |  |  |



MISSION 3.

|                                                                                                                                                                                                                          |                                                                                                                                                                                                                                          |                                                                                                                                                                                          |                                                                                                                   |                                                                      |                                                                                                                   |     |                   |                  |                     |   |   |           |        |            |                        |
|--------------------------------------------------------------------------------------------------------------------------------------------------------------------------------------------------------------------------|------------------------------------------------------------------------------------------------------------------------------------------------------------------------------------------------------------------------------------------|------------------------------------------------------------------------------------------------------------------------------------------------------------------------------------------|-------------------------------------------------------------------------------------------------------------------|----------------------------------------------------------------------|-------------------------------------------------------------------------------------------------------------------|-----|-------------------|------------------|---------------------|---|---|-----------|--------|------------|------------------------|
| Subscriber <input type="checkbox"/> dispatch center <input type="checkbox"/> other, what? Origin <input type="checkbox"/> station <input type="checkbox"/> other, what?                                                  |                                                                                                                                                                                                                                          | Identity number                                                                                                                                                                          | Travel date                                                                                                       | Unit                                                                 | Running no                                                                                                        |     |                   |                  |                     |   |   |           |        |            |                        |
| Emergency call 1618                                                                                                                                                                                                      |                                                                                                                                                                                                                                          | Patient name JUUSELA KYLLIKI                                                                                                                                                             |                                                                                                                   | Dispatch code                                                        |                                                                                                                   |     |                   |                  |                     |   |   |           |        |            |                        |
| Mission start 1619                                                                                                                                                                                                       |                                                                                                                                                                                                                                          | Patient on additional place <input type="checkbox"/> on stretchers <input type="checkbox"/> sitting                                                                                      |                                                                                                                   | Transp / canc code                                                   |                                                                                                                   |     |                   |                  |                     |   |   |           |        |            |                        |
| On scene 1626                                                                                                                                                                                                            |                                                                                                                                                                                                                                          | Home address (street and city)                                                                                                                                                           |                                                                                                                   | Home municipality <input type="checkbox"/> Foreigner / form attached |                                                                                                                   |     |                   |                  |                     |   |   |           |        |            |                        |
| At patient 1626                                                                                                                                                                                                          |                                                                                                                                                                                                                                          | Reference no                                                                                                                                                                             |                                                                                                                   | Driving km total                                                     |                                                                                                                   |     |                   |                  |                     |   |   |           |        |            |                        |
| Transport                                                                                                                                                                                                                | Cause of transport                                                                                                                                                                                                                       |                                                                                                                                                                                          | No Kela reimbursement                                                                                             |                                                                      | Euros                                                                                                             |     |                   |                  |                     |   |   |           |        |            |                        |
| Patient released                                                                                                                                                                                                         | <input type="checkbox"/> Illness or pregnancy<br><input checked="" type="checkbox"/> Motor vehicle accident *) Registration number XXX-123<br><input type="checkbox"/> Accident at work *)<br><input type="checkbox"/> Insurance company |                                                                                                                                                                                          | <input type="checkbox"/> Care facility / hospital patient <input type="checkbox"/> Other<br>To be invoiced where? |                                                                      | Basic fee -20 km<br>Invoiceable extra kilometres km<br>2. ambulance driver h min<br>Waiting time (over 1hr) h min |     |                   |                  |                     |   |   |           |        |            |                        |
| Mission end                                                                                                                                                                                                              |                                                                                                                                                                                                                                          |                                                                                                                                                                                          |                                                                                                                   |                                                                      | In total                                                                                                          |     |                   |                  |                     |   |   |           |        |            |                        |
| Description of the situation. Primary reason (symptom or seizure/arrest, mechanism of injury; time of start or event), eye witness's contact information)                                                                |                                                                                                                                                                                                                                          |                                                                                                                                                                                          |                                                                                                                   |                                                                      | Excess                                                                                                            |     |                   |                  |                     |   |   |           |        |            |                        |
| ON THE BACK SEAT AT THE TIME OF THE CRASH, COLLISION INVOLVING 2 CARS.                                                                                                                                                   |                                                                                                                                                                                                                                          |                                                                                                                                                                                          |                                                                                                                   |                                                                      | Invoiced from Kela                                                                                                |     |                   |                  |                     |   |   |           |        |            |                        |
| Primary impression (symptom, trauma-related findings)                                                                                                                                                                    |                                                                                                                                                                                                                                          |                                                                                                                                                                                          |                                                                                                                   |                                                                      | First-response unit on scene                                                                                      |     |                   |                  |                     |   |   |           |        |            |                        |
| WALKING. NO PAIN.                                                                                                                                                                                                        |                                                                                                                                                                                                                                          |                                                                                                                                                                                          |                                                                                                                   |                                                                      |                                                                                                                   |     |                   |                  |                     |   |   |           |        |            |                        |
| Diseases, current medication, drug allergies, previous hospital treatment                                                                                                                                                |                                                                                                                                                                                                                                          |                                                                                                                                                                                          |                                                                                                                   |                                                                      |                                                                                                                   |     |                   |                  |                     |   |   |           |        |            |                        |
| MONITORING AT                                                                                                                                                                                                            | BLOOD PRESS.                                                                                                                                                                                                                             | HEART RATE                                                                                                                                                                               | RHYTHM                                                                                                            | RESPIRAT. RATE                                                       | RESPIRAT. AUSCULT.                                                                                                | PEF | ETCO <sub>2</sub> | SpO <sub>2</sub> | CONSCIOUSNESS (GCS) |   |   | PAIN 0-10 | B-gluc | ALC. METER | TEMPERATURE from where |
| When met A 16:26                                                                                                                                                                                                         | A. BAD+                                                                                                                                                                                                                                  |                                                                                                                                                                                          |                                                                                                                   |                                                                      |                                                                                                                   |     |                   | 100              | 4                   | 5 | 6 | 0         |        |            |                        |
| B                                                                                                                                                                                                                        |                                                                                                                                                                                                                                          |                                                                                                                                                                                          |                                                                                                                   |                                                                      |                                                                                                                   |     |                   |                  |                     |   |   |           |        |            |                        |
| C                                                                                                                                                                                                                        |                                                                                                                                                                                                                                          |                                                                                                                                                                                          |                                                                                                                   |                                                                      |                                                                                                                   |     |                   |                  |                     |   |   |           |        |            |                        |
| Patient handover D                                                                                                                                                                                                       |                                                                                                                                                                                                                                          |                                                                                                                                                                                          |                                                                                                                   |                                                                      |                                                                                                                   |     |                   |                  |                     |   |   |           |        |            |                        |
| Treatment (interventions, medication) and response. <input type="checkbox"/> Consultation with physic. <input checked="" type="checkbox"/> Physician on scene. Physician's name and position. Instructions for treatment |                                                                                                                                                                                                                                          |                                                                                                                                                                                          |                                                                                                                   |                                                                      | FHSD STUDY PHYSICIAN                                                                                              |     |                   |                  |                     |   |   |           |        |            |                        |
| Signature of person refusing treatment / transportation                                                                                                                                                                  |                                                                                                                                                                                                                                          |                                                                                                                                                                                          |                                                                                                                   |                                                                      | <input type="checkbox"/> Information continues on another sheet                                                   |     |                   |                  |                     |   |   |           |        |            |                        |
| Signature and number of person giving treatment                                                                                                                                                                          |                                                                                                                                                                                                                                          | Numbers of other personnel                                                                                                                                                               |                                                                                                                   | Name and phone number of next of kin                                 |                                                                                                                   |     |                   |                  |                     |   |   |           |        |            |                        |
| DECLARATION OF THE HEALTH CARE FACILITY                                                                                                                                                                                  |                                                                                                                                                                                                                                          | I hereby declare based on the previous report that the patient's physical condition <input type="checkbox"/> requires <input type="checkbox"/> doesn't require ambulance transportation. |                                                                                                                   |                                                                      | Name and stamp of the receiving facility                                                                          |     |                   |                  |                     |   |   |           |        |            |                        |
|                                                                                                                                                                                                                          |                                                                                                                                                                                                                                          | Signature, clarification of signature and position of the person receiving the patient                                                                                                   |                                                                                                                   |                                                                      | 49                                                                                                                |     |                   |                  |                     |   |   |           |        |            |                        |



MISSION 5.

|                                                                                                                                                                                                                                                                                             |                                                                                                                                   |                                                                 |                                                                                                                                                                                                                                         |                                                                                                                         |              |                                                                                                                                                                                                                                                                                                                                                                                           |                                                                                   |                          |
|---------------------------------------------------------------------------------------------------------------------------------------------------------------------------------------------------------------------------------------------------------------------------------------------|-----------------------------------------------------------------------------------------------------------------------------------|-----------------------------------------------------------------|-----------------------------------------------------------------------------------------------------------------------------------------------------------------------------------------------------------------------------------------|-------------------------------------------------------------------------------------------------------------------------|--------------|-------------------------------------------------------------------------------------------------------------------------------------------------------------------------------------------------------------------------------------------------------------------------------------------------------------------------------------------------------------------------------------------|-----------------------------------------------------------------------------------|--------------------------|
| <input type="checkbox"/> Kuopio<br><input type="checkbox"/> Tampere                                                                                                                                                                                                                         |                                                                                                                                   | <input type="checkbox"/> Oulu<br><input type="checkbox"/> Turku |                                                                                                                                                                                                                                         | <input type="checkbox"/> Rovaniemi<br><input type="checkbox"/> Vantaa<br><input checked="" type="checkbox"/> STUDY BASE |              | Mission ID                                                                                                                                                                                                                                                                                                                                                                                | Dispatch code<br>??                                                               | Transp / canc code<br>?? |
| Date<br>18.9.2016                                                                                                                                                                                                                                                                           | Scene address<br>TUTKIMUSKATU 10                                                                                                  |                                                                 |                                                                                                                                                                                                                                         | <input checked="" type="checkbox"/> = home address<br>Emerg call 00:06                                                  |              | Amb                                                                                                                                                                                                                                                                                                                                                                                       | <input checked="" type="checkbox"/> Ground unit<br><input type="checkbox"/> Other |                          |
| Patient name<br>HIMANEN JAAKKO                                                                                                                                                                                                                                                              |                                                                                                                                   | Municipality<br>TUTKIMUSKAUPUNKI                                |                                                                                                                                                                                                                                         | Alarm                                                                                                                   |              | 00:07                                                                                                                                                                                                                                                                                                                                                                                     | ??                                                                                |                          |
| Identity number<br>2 YEARS OLD                                                                                                                                                                                                                                                              | Home municipality / country<br>TUTKIMUSKAUPUNKI                                                                                   |                                                                 | Dispatcher<br>?                                                                                                                                                                                                                         |                                                                                                                         | On scene     |                                                                                                                                                                                                                                                                                                                                                                                           |                                                                                   |                          |
| Hospital<br>Y9                                                                                                                                                                                                                                                                              | <input type="checkbox"/> Reported / scene<br><input type="checkbox"/> Police<br><input checked="" type="checkbox"/> Family<br>Tel |                                                                 | Point of departure<br>Station / other                                                                                                                                                                                                   |                                                                                                                         | At patient   |                                                                                                                                                                                                                                                                                                                                                                                           | 00:42                                                                             |                          |
|                                                                                                                                                                                                                                                                                             |                                                                                                                                   |                                                                 |                                                                                                                                                                                                                                         |                                                                                                                         | Transp start |                                                                                                                                                                                                                                                                                                                                                                                           | 00:44                                                                             |                          |
| Transportation<br><input checked="" type="checkbox"/> Amb + <input checked="" type="checkbox"/> DOC/param. <input type="checkbox"/> Helicopter<br><input type="checkbox"/> Other                                                                                                            |                                                                                                                                   |                                                                 | HBS 0-8<br>??                                                                                                                                                                                                                           |                                                                                                                         | At hospital  |                                                                                                                                                                                                                                                                                                                                                                                           | 01:25                                                                             |                          |
|                                                                                                                                                                                                                                                                                             |                                                                                                                                   |                                                                 |                                                                                                                                                                                                                                         |                                                                                                                         | Free         |                                                                                                                                                                                                                                                                                                                                                                                           | 01:30                                                                             |                          |
| Physician / paramedic<br>STUDY PHYSICIAN                                                                                                                                                                                                                                                    |                                                                                                                                   |                                                                 |                                                                                                                                                                                                                                         |                                                                                                                         | Mission end  |                                                                                                                                                                                                                                                                                                                                                                                           | ??                                                                                |                          |
| Description of the situation<br>EPILEPTIC. SEIZURE PERSISTED IN SPITE OF MEDICATION.                                                                                                                                                                                                        |                                                                                                                                   |                                                                 |                                                                                                                                                                                                                                         |                                                                                                                         |              |                                                                                                                                                                                                                                                                                                                                                                                           |                                                                                   |                          |
| Primary impression<br>ETU 3221 ENCOUNTERED ON FREEWAY, PATIENT BREATHING SPONTANEOUSLY, KEEPING EYES CLOSED, MAKING NO SOUNDS, GAZE DEVIATES TO RIGHT, FLEXES UPPER LIMBS TO PAIN. 2.5MG IN DIAZEPAM (STESOLID) IS ADMINISTERED -> IMPROVEMENT IN GAZE                                      |                                                                                                                                   |                                                                 |                                                                                                                                                                                                                                         |                                                                                                                         |              |                                                                                                                                                                                                                                                                                                                                                                                           |                                                                                   |                          |
| Response to treatment<br>TRANSPORTATION TO Y9 LYING ON SIDE. PEDIATRIC ICU CONSULTATED -> TRANSPORTATION DIRECTLY PICU. PATIENT IMPROVING, WAKING UP, MEDICATION RECENTLY, MAKING EYE CONTACT                                                                                               |                                                                                                                                   |                                                                 |                                                                                                                                                                                                                                         |                                                                                                                         |              |                                                                                                                                                                                                                                                                                                                                                                                           |                                                                                   |                          |
| Primary diseases, home medication<br>NEUROLOGICAL (MENTAL) DELAY EPILEPSY. CHANGED. MOTHER CAN'T REMEMBER NAME OF                                                                                                                                                                           |                                                                                                                                   |                                                                 |                                                                                                                                                                                                                                         |                                                                                                                         |              |                                                                                                                                                                                                                                                                                                                                                                                           |                                                                                   |                          |
| Trauma patient<br><input checked="" type="checkbox"/> open fracture<br><input type="checkbox"/> fracture<br><input checked="" type="checkbox"/> fracture / laceration / tenderness<br><input type="checkbox"/> deep / penetrating injury<br><input checked="" type="checkbox"/> no findings |                                                                                                                                   |                                                                 |                                                                                                                                                                                                                                         | 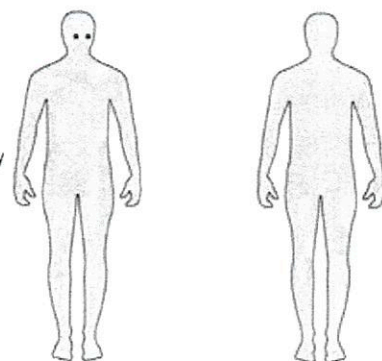                                     |              | GCS<br>Eye-opening 1-4<br>4 spontaneously<br>3 to speech<br>2 to pain<br>1 no response<br>Verbal response 1-5<br>5 oriented<br>4 confused<br>3 inappropriate words<br>2 sounds<br>1 no response<br>Motor response 1-6<br>6 obeys commands<br>5 moves to pain<br>4 withdrawal from pain<br>3 abnormal flexion<br>2 abnormal extension<br>1 no response                                     |                                                                                   |                          |
| Working diagnosis<br>EPILEPSY                                                                                                                                                                                                                                                               |                                                                                                                                   |                                                                 |                                                                                                                                                                                                                                         | Total<br>Eye-opening 1-4: 4<br>Verbal response 1-5: 5<br>Motor response 1-6: 6                                          |              |                                                                                                                                                                                                                                                                                                                                                                                           |                                                                                   |                          |
| Resuscitation<br><input type="checkbox"/> Witnessed OHCA<br><input type="checkbox"/> During treatment<br><input type="checkbox"/> Unwitnessed OHCA<br><input type="checkbox"/> Bystander CPR<br><input type="checkbox"/> No ACLS, reason _____                                              |                                                                                                                                   |                                                                 | Primary rhythm<br><input type="checkbox"/> VF <input type="checkbox"/> PEA<br><input type="checkbox"/> ASY <input type="checkbox"/> Other _____<br>Delays since the start of call (min):<br>First response FinnHEMS<br>1. DC _____ ROSC |                                                                                                                         |              | Acute coronary event<br>Ecg at _____<br>Ecg at _____<br>Pain started app. at _____<br>Continuous pain at _____<br>Delay of thrombolysis _____ min thrombolysis at _____<br><input type="checkbox"/> since the start / aggravation of pain <input type="checkbox"/> contraindication check<br><input type="checkbox"/> PCI/ UAP -treatment <input type="checkbox"/> Cardiolog consultation |                                                                                   |                          |
| <input type="checkbox"/> Temporary ROSC at _____, permanent at _____                                                                                                                                                                                                                        |                                                                                                                                   |                                                                 |                                                                                                                                                                                                                                         |                                                                                                                         |              |                                                                                                                                                                                                                                                                                                                                                                                           |                                                                                   |                          |







Kela

Service provider and VAT number

MISSION 5.

Report and claim for reimbursement for patient transportation

OSA 1

|                                                                                                                                                                                                                                    |                 |              |                                                                                          |                                     |                    |     |       |      |                                       |           |        |            |                        |
|------------------------------------------------------------------------------------------------------------------------------------------------------------------------------------------------------------------------------------|-----------------|--------------|------------------------------------------------------------------------------------------|-------------------------------------|--------------------|-----|-------|------|---------------------------------------|-----------|--------|------------|------------------------|
| Identity number                                                                                                                                                                                                                    |                 | 2 YEARS OLD  | Travel date                                                                              | Unit                                | Running no         |     |       |      |                                       |           |        |            |                        |
|                                                                                                                                                                                                                                    |                 |              | 180916                                                                                   | ETU 3221                            |                    |     |       |      |                                       |           |        |            |                        |
| Subscriber                                                                                                                                                                                                                         | dispatch center | other, what? | Origin                                                                                   | station                             | other, what?       |     |       |      |                                       |           |        |            |                        |
| Emergency call                                                                                                                                                                                                                     |                 |              | Patient name                                                                             | Scene address                       |                    |     |       |      |                                       |           |        |            |                        |
| 0006                                                                                                                                                                                                                               |                 |              | HIMANEN JAAKKO                                                                           | TUTKIMUSKATU 10<br>TUTKIMUSKAUPUNKI |                    |     |       |      |                                       |           |        |            |                        |
| Mission start                                                                                                                                                                                                                      |                 |              | Patient on additional place                                                              |                                     |                    |     |       |      |                                       |           |        |            |                        |
| 0007                                                                                                                                                                                                                               |                 |              | <input type="checkbox"/> on stretchers <input type="checkbox"/> sitting                  |                                     |                    |     |       |      |                                       |           |        |            |                        |
| On scene                                                                                                                                                                                                                           |                 |              | Home address (street and city)                                                           |                                     |                    |     |       |      |                                       |           |        |            |                        |
| 0012                                                                                                                                                                                                                               |                 |              | TUTKIMUSKAUPUNKI                                                                         |                                     |                    |     |       |      |                                       |           |        |            |                        |
| At patient                                                                                                                                                                                                                         |                 |              | Home municipality                                                                        |                                     |                    |     |       |      |                                       |           |        |            |                        |
| 0013                                                                                                                                                                                                                               |                 |              | TUTKIMUSKAUPUNKI                                                                         |                                     |                    |     |       |      |                                       |           |        |            |                        |
| Transport                                                                                                                                                                                                                          |                 |              | Reference no                                                                             |                                     |                    |     |       |      |                                       |           |        |            |                        |
| Cause of transport                                                                                                                                                                                                                 |                 |              | No Kela reimbursement                                                                    |                                     |                    |     |       |      |                                       |           |        |            |                        |
| <input type="checkbox"/> Illness or pregnancy                                                                                                                                                                                      |                 |              | <input type="checkbox"/> Care facility / hospital patient <input type="checkbox"/> Other |                                     |                    |     |       |      |                                       |           |        |            |                        |
| Patient released                                                                                                                                                                                                                   |                 |              | To be invoiced where?                                                                    |                                     |                    |     |       |      |                                       |           |        |            |                        |
| <input type="checkbox"/> Motor vehicle accident *) Registration number                                                                                                                                                             |                 |              |                                                                                          |                                     |                    |     |       |      |                                       |           |        |            |                        |
| <input type="checkbox"/> Accident at work *)                                                                                                                                                                                       |                 |              |                                                                                          |                                     |                    |     |       |      |                                       |           |        |            |                        |
| Mission end                                                                                                                                                                                                                        |                 |              | Basic fee -20 km                                                                         |                                     |                    |     |       |      |                                       |           |        |            |                        |
| <input type="checkbox"/> *) Insurance company                                                                                                                                                                                      |                 |              | Invoiceable extra kilometres km                                                          |                                     |                    |     |       |      |                                       |           |        |            |                        |
|                                                                                                                                                                                                                                    |                 |              | 2. ambulance driver h min                                                                |                                     |                    |     |       |      |                                       |           |        |            |                        |
|                                                                                                                                                                                                                                    |                 |              | Waiting time (over 1hr) h min                                                            |                                     |                    |     |       |      |                                       |           |        |            |                        |
| Description of the situation. Primary reason (symptom or seizure/arrest, mechanism of injury; time of start or event), eye witness's contact information                                                                           |                 |              | In total                                                                                 |                                     |                    |     |       |      |                                       |           |        |            |                        |
| EPILEPTIC, MOTHER WAKENED BY NOISE, FOUND HAVING A SEIZURE IN BED. MOTHER GAVE 5 MG OF BULLAL MIDAZOLAM, THEN MADE THE EMERGENCY CALL.                                                                                             |                 |              | Excess                                                                                   |                                     |                    |     |       |      |                                       |           |        |            |                        |
|                                                                                                                                                                                                                                    |                 |              | Invoiced from Kela                                                                       |                                     |                    |     |       |      |                                       |           |        |            |                        |
| Primary impression (symptom, trauma-related findings)                                                                                                                                                                              |                 |              | First-response unit on scene                                                             |                                     |                    |     |       |      |                                       |           |        |            |                        |
| LYING ON SIDE IN BED, BREATHING, LIMBS STILL TWITCHING. IV ACCESS AT 00:15, DIAZEPAM 2.5 MG AT 00:16 AND ADDITIONAL DOSE 2.5 MG AT 00:18; CALL TO FH 90 PHYSICIAN AND ONE MORE DIAZEP. 2.5 MG 00:20 -> SEIZING STILL PERSISTS      |                 |              |                                                                                          |                                     |                    |     |       |      |                                       |           |        |            |                        |
| Diseases, current medication, drug allergies, previous hospital treatment                                                                                                                                                          |                 |              |                                                                                          |                                     |                    |     |       |      |                                       |           |        |            |                        |
| NEUROLOGICAL (MENTAL) DELAY + EPILEPSY. MEDICATION CHANGED 2 WEEKS AGO. LAST SEIZURE 6 MONTHS AGO.                                                                                                                                 |                 |              |                                                                                          |                                     |                    |     |       |      |                                       |           |        |            |                        |
| MONITORING AT                                                                                                                                                                                                                      | BLOOD PRESS.    | HEART RATE   | RHYTHM                                                                                   | RESPIRAT. RATE                      | RESPIRAT. AUSCULT. | PEF | ETCO2 | SpO2 | CONSCIOUSNESS (GCS) Eyes Verbal Motor | PAIN 0-10 | B-gluc | ALC. METER | TEMPERATURE from where |
| When met A                                                                                                                                                                                                                         |                 |              |                                                                                          |                                     |                    |     |       |      |                                       |           |        |            |                        |
| B                                                                                                                                                                                                                                  |                 |              |                                                                                          |                                     |                    |     |       |      |                                       |           |        |            |                        |
| C                                                                                                                                                                                                                                  |                 |              |                                                                                          |                                     |                    |     |       |      |                                       |           |        |            |                        |
| Patient handover. D                                                                                                                                                                                                                |                 |              |                                                                                          |                                     |                    |     |       |      |                                       |           |        |            |                        |
| Treatment (interventions, medication) and response. <input type="checkbox"/> Consultation with physici. <input checked="" type="checkbox"/> Physician on scene. Physician's name and position. Instructions for treatment          |                 |              |                                                                                          |                                     |                    |     |       |      |                                       |           |        |            |                        |
| AT 00:22 SEIZURES CEASED PATIENT SLEEPY, BREATHING SPONTANEOUSLY, FH 90 PHYSICIAN ON SCENE AT 00:42. PATIENT'S GAZE DEVIATES TO THE RIGHT -> 2.5 MG OF DIAZEPAM IV. AT 01:20 PATIENT IMPROVES, HANDOVER TO HOSPITAL UNPROBLEMATIC. |                 |              |                                                                                          |                                     |                    |     |       |      |                                       |           |        |            |                        |
| Signature of person refusing treatment / transportation                                                                                                                                                                            |                 |              |                                                                                          |                                     |                    |     |       |      |                                       |           |        |            |                        |
| Signature and number of person giving treatment                                                                                                                                                                                    |                 |              |                                                                                          |                                     |                    |     |       |      |                                       |           |        |            |                        |
| Numbers of other personnel                                                                                                                                                                                                         |                 |              |                                                                                          |                                     |                    |     |       |      |                                       |           |        |            |                        |
| Name and phone number of next of kin                                                                                                                                                                                               |                 |              |                                                                                          |                                     |                    |     |       |      |                                       |           |        |            |                        |
| HIMANEN SARI                                                                                                                                                                                                                       |                 |              |                                                                                          |                                     |                    |     |       |      |                                       |           |        |            |                        |
| Information continues on another sheet                                                                                                                                                                                             |                 |              |                                                                                          |                                     |                    |     |       |      |                                       |           |        |            |                        |
| DECLARATION OF THE HEALTH CARE FACILITY                                                                                                                                                                                            |                 |              |                                                                                          |                                     |                    |     |       |      |                                       |           |        |            |                        |
| I hereby declare based on the previous report that the patient's physical condition <input type="checkbox"/> requires <input type="checkbox"/> doesn't require ambulance transportation.                                           |                 |              |                                                                                          |                                     |                    |     |       |      |                                       |           |        |            |                        |
| Signature, clarification of signature and position of the person receiving the patient                                                                                                                                             |                 |              |                                                                                          |                                     |                    |     |       |      |                                       |           |        |            |                        |
| Name and stamp of the receiving facility                                                                                                                                                                                           |                 |              |                                                                                          |                                     |                    |     |       |      |                                       |           |        |            |                        |
| Y9 PEDIATRIL ICU                                                                                                                                                                                                                   |                 |              |                                                                                          |                                     |                    |     |       |      |                                       |           |        |            |                        |



MISSION 6.

|                                                                                                                                                            |                                                                             |                                                                                        |  |                                                                                                                         |              |                                                                                   |                       |                           |  |
|------------------------------------------------------------------------------------------------------------------------------------------------------------|-----------------------------------------------------------------------------|----------------------------------------------------------------------------------------|--|-------------------------------------------------------------------------------------------------------------------------|--------------|-----------------------------------------------------------------------------------|-----------------------|---------------------------|--|
| <input type="checkbox"/> Kuopio<br><input type="checkbox"/> Tampere                                                                                        |                                                                             | <input type="checkbox"/> Oulu<br><input type="checkbox"/> Turku                        |  | <input type="checkbox"/> Rovaniemi<br><input type="checkbox"/> Vantaa<br><input checked="" type="checkbox"/> STUDY BASE |              | Mission ID                                                                        | Dispatch code<br>A752 | Transp / canc code<br>X-6 |  |
| Date<br>18.9.2016                                                                                                                                          | Scene address<br>HAMARAKUJA 16 F 78 <input type="checkbox"/> = home address |                                                                                        |  | Emerg call<br>01:48                                                                                                     | Amb ETO 1221 | <input checked="" type="checkbox"/> Ground unit<br><input type="checkbox"/> Other |                       |                           |  |
| Patient name<br>"PATE"                                                                                                                                     |                                                                             |                                                                                        |  | Municipality<br>TUTKIMUSKUNTO                                                                                           |              | Alarm                                                                             | 01:50                 |                           |  |
| Identity number<br>APRX. 20 YEAR OLD                                                                                                                       |                                                                             | Home municipality / country                                                            |  | Dispatcher<br>HAVE                                                                                                      |              | On scene                                                                          |                       | 01:54                     |  |
| Hospital<br>X-6                                                                                                                                            |                                                                             | Reported / scene<br><input type="checkbox"/> Police<br><input type="checkbox"/> Family |  | Point of departure<br>Station <u>other</u>                                                                              |              | At patient                                                                        |                       | 01:55                     |  |
| Tel                                                                                                                                                        |                                                                             |                                                                                        |  |                                                                                                                         |              | Transp start                                                                      |                       |                           |  |
| Transportation<br><input type="checkbox"/> Amb + <input type="checkbox"/> DOC/param. <input type="checkbox"/> Helicopter<br><input type="checkbox"/> Other |                                                                             |                                                                                        |  | HBS 0-8<br>??                                                                                                           |              | At hospital                                                                       |                       |                           |  |
|                                                                                                                                                            |                                                                             |                                                                                        |  |                                                                                                                         |              | Free                                                                              |                       | 02:17                     |  |
| Physician / paramedic<br>STUDY PHYSICIAN                                                                                                                   |                                                                             |                                                                                        |  |                                                                                                                         |              | Mission end                                                                       |                       | ??                        |  |

**Description of the situation**  
 A FRIEND REPORTS THAT "PATE" HAD INJECTED FENTANYL. THERE HAD BEEN OTHERS PRESENT, LEFT THE SCENE. "PATE'S" IDENTITY NOT EXACTLY KNOWN.

**Primary impression**  
 SLUMPED UNCONSCIOUS IN AN ARMCHAIR, PALE BLUEISH, BREATHING SPARSE → MASK VENTILATION INITIATED & SpO<sub>2</sub> 40 → SpO<sub>2</sub> 90, HR 40 → 88, BP 100/50, GLUC 6.3, IV ACCESS → NALOXONE 0,4 MG IV → PATIENT WAKES UP

**Response to treatment**  
 AFTER NALOXONE WAKES UP, IS LUCID. BP 122/79, HR 92, SpO<sub>2</sub> 97. TOTALLY REFUSES ANY TREATMENT. NEUROLOGY OK. NO INJURIES.

**Primary diseases, home medication**  
 HEPATITIS C | ADDITIONAL 0,8 MG NALOXONE IV, STAYS WITH FRIEND.

|                                                                                                                                                                                                                                                                                                    |  |                                                                                     |  |                                                                                                                                                                                                                                                                                                                                                              |  |                                                |  |
|----------------------------------------------------------------------------------------------------------------------------------------------------------------------------------------------------------------------------------------------------------------------------------------------------|--|-------------------------------------------------------------------------------------|--|--------------------------------------------------------------------------------------------------------------------------------------------------------------------------------------------------------------------------------------------------------------------------------------------------------------------------------------------------------------|--|------------------------------------------------|--|
| <b>Trauma patient</b><br><input checked="" type="checkbox"/> open fracture<br><input type="checkbox"/> fracture<br><input checked="" type="checkbox"/> fracture / laceration / tenderness<br><input type="checkbox"/> deep / penetrating injury<br><input checked="" type="checkbox"/> no findings |  | 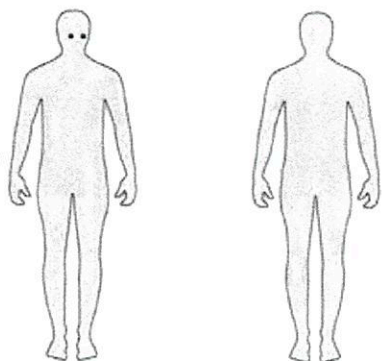 |  | <b>GCS</b><br>Eye-opening 1-4<br>4 spontaneously<br>3 to speech<br>2 to pain<br>1 no response<br>Verbal response 1-5<br>5 oriented<br>4 confused<br>3 inappropriate words<br>2 sounds<br>1 no response<br>Motor response 1-6<br>6 obeys commands<br>5 moves to pain<br>4 withdrawal from pain<br>3 abnormal flexion<br>2 abnormal extension<br>1 no response |  | 01:55 02:10<br>1 4<br>1 5<br>1 6<br>Total 3 15 |  |
|----------------------------------------------------------------------------------------------------------------------------------------------------------------------------------------------------------------------------------------------------------------------------------------------------|--|-------------------------------------------------------------------------------------|--|--------------------------------------------------------------------------------------------------------------------------------------------------------------------------------------------------------------------------------------------------------------------------------------------------------------------------------------------------------------|--|------------------------------------------------|--|

|                                                                                                                                                                                                                                                                                                                               |  |                                                                                                                                                                                                                                                             |  |                                                                                                                                                                                                                                                                                                                                                                          |  |
|-------------------------------------------------------------------------------------------------------------------------------------------------------------------------------------------------------------------------------------------------------------------------------------------------------------------------------|--|-------------------------------------------------------------------------------------------------------------------------------------------------------------------------------------------------------------------------------------------------------------|--|--------------------------------------------------------------------------------------------------------------------------------------------------------------------------------------------------------------------------------------------------------------------------------------------------------------------------------------------------------------------------|--|
| <b>Resuscitation</b><br><input type="checkbox"/> Witnessed OHCA<br><input type="checkbox"/> During treatment<br><input type="checkbox"/> Unwitnessed OHCA<br><input type="checkbox"/> Bystander CPR<br><input type="checkbox"/> No ACLS, reason _____<br><input type="checkbox"/> Temporary ROSC at _____, permanent at _____ |  | <b>Primary rhythm</b><br><input type="checkbox"/> VF <input type="checkbox"/> PEA<br><input type="checkbox"/> ASY <input type="checkbox"/> Other _____<br><b>Delays since the start of call (min):</b><br>First response FinnHEMS<br>1. DC _____ ROSC _____ |  | <b>Acute coronary event</b><br>Ecg at _____<br>Ecg at _____<br>Pain started app. at _____<br>Continuous pain at _____<br>Delay of thrombolysis _____ min thrombolysis at _____<br>since the start / aggravation of pain <input type="checkbox"/> contraindication check<br><input type="checkbox"/> PCI/ UAP -treatment <input type="checkbox"/> Cardiology consultation |  |
|-------------------------------------------------------------------------------------------------------------------------------------------------------------------------------------------------------------------------------------------------------------------------------------------------------------------------------|--|-------------------------------------------------------------------------------------------------------------------------------------------------------------------------------------------------------------------------------------------------------------|--|--------------------------------------------------------------------------------------------------------------------------------------------------------------------------------------------------------------------------------------------------------------------------------------------------------------------------------------------------------------------------|--|
